# Supplementary material for: Mental Health Variables Impact Weight Loss, Especially in Patients with Obesity and Binge Eating: A Mediation Model on the Role of Eating Disorder Pathology
Source: MDPI journal article supplement (doi:10.3390/nu15183915), 2023-09-09
Supplement: s1 [file s1]

## Supplementary material

### Mental Health Variables Impact Weight Loss, especially in Patients with Obesity and Binge Eating: A Mediation Model on The Role of Eating Disorder Pathology

Jacopo Pruccoli, Isabelle Mack\*, Bea Klos, Sandra Schild, Andreas Stengel, Stephan Zipfel, Katrin Elisabeth Giel, Kathrin Schag

Table S1. Mediation model (regression with EDE-Q, direct, and indirect paths) for the overall sample.

|                                                     | Regressions with EDE-Q (a) |                          | Indirect path (ab) |                          | Direct path (c') |                          |
|-----------------------------------------------------|----------------------------|--------------------------|--------------------|--------------------------|------------------|--------------------------|
|                                                     | p-value                    | Standardized coefficient | p-value            | Standardized coefficient | p-value          | Standardized coefficient |
| <u>TFEQ</u><br><u>cognitive</u><br><u>restraint</u> | <b>0&lt;.001</b>           | <b>0.272</b>             | <b>0.029</b>       | <b>-0.032</b>            | 0.895            | 0.005                    |
| TFEQ<br>disinhibition                               | <b>&lt;0.001</b>           | <b>0.161</b>             | 0.058              | -0.019                   | <b>&lt;0.001</b> | <b>-0.185</b>            |
| TFEQ hunger                                         | <b>0.046</b>               | <b>0.073</b>             | 0.131              | -0.009                   | <b>&lt;0.001</b> | <b>0.253</b>             |
| <u>BIS</u>                                          | <b>0&lt;.001</b>           | <b>0.211</b>             | <b>0.030</b>       | <b>-0.025</b>            | <b>&lt;0.001</b> | <b>-0.216</b>            |
| <u>PHQ-9</u>                                        | <b>0&lt;.001</b>           | <b>0.360</b>             | <b>0.032</b>       | <b>-0.042</b>            | 0.136            | 0.086                    |
| PSQ                                                 | 0.084                      | 0.082                    | 0.173              | -0.010                   | <b>0.003</b>     | <b>-0.171</b>            |
| GAD                                                 | 0.091                      | 0.083                    | 0.251              | -0.010                   | <b>0.003</b>     | <b>0.207</b>             |

(a) Standardized coefficients for regressions between psychopathology/eating behavior variables and EDE-Q; (ab): standardized coefficients for the indirect path between psychopathology/eating behavior variables and admission-discharge BMI difference via EDE-Q, (c'): Standardized coefficients for the direct path between psychopathology/eating behavior variables and admission-discharge BMI difference, controlling for the mediating variable (EDE-Q).

**Notes:** Variables involved in the final mediation model are reported in bold and underlined. Statistically significant correlations and mediation paths are reported in bold.

Abbreviations: BIS: Barratt Impulsiveness Scale, total score; EDE-Q: Eating Disorder Examination Questionnaire, total score; GAD: Generalized Anxiety Disorder Scale, total score; PHQ-9: Patient Health Questionnaire; PSQ: Perceived Stress Questionnaire, total score; TFEQ: Three-Factor-Eating-Questionnaire.

Table S2. Mediation model (regression with EDE-Q, direct, and indirect paths) for patients with obesity and regular binge eating.

|                                 | Regressions with EDE-Q (a) |                          | Indirect path (ab) |                          | Direct path (c') |                          |
|---------------------------------|----------------------------|--------------------------|--------------------|--------------------------|------------------|--------------------------|
|                                 | p-value                    | Standardized coefficient | p-value            | Standardized coefficient | p-value          | Standardized coefficient |
| <u>TFEQ cognitive restraint</u> | <0.001                     | <b>0.371</b>             | <b>0.002</b>       | <b>-0.075</b>            | 0.092            | 0.085                    |
| <u>TFEQ disinhibition</u>       | <0.001                     | <b>0.296</b>             | <b>0.002</b>       | <b>-0.060</b>            | <b>0.007</b>     | <b>-0.140</b>            |
| TFEQ hunger                     | .598                       | 0.023                    | 0.621              | -0.005                   | <b>0&lt;.001</b> | <b>0.280</b>             |
| <u>BIS</u>                      | <0.001                     | <b>0.185</b>             | <b>0.005</b>       | <b>-0.038</b>            | 0.984            | -0.001                   |
| <u>PHQ-9</u>                    | <0.001                     | <b>0.394</b>             | <b>0.002</b>       | <b>-0.080</b>            | 0.544            | 0.047                    |
| <u>PSQ</u>                      | <b>0.005</b>               | <b>0.146</b>             | <b>0.044</b>       | <b>-0.030</b>            | 0.328            | -0.073                   |
| GAD                             | 0.204                      | -0.069                   | 0.261              | 0.014                    | 0.979            | 0.002                    |

(a) Standardized coefficients for regressions between psychopathology/eating behavior variables and EDE-Q; (ab): standardized coefficients for the indirect path between psychopathology/eating behavior variables and admission-discharge BMI difference via EDE-Q, (c'): Standardized coefficients for the direct path between psychopathology/eating behavior variables and admission-discharge BMI difference, controlling for the mediating variable (EDE-Q).

**Notes:** Variables involved in the final mediation model are reported in bold and underlined. Statistically significant correlations and mediation paths are reported in bold.

Abbreviations: BIS: Barratt Impulsiveness Scale, total score; EDE-Q: Eating Disorder Examination Questionnaire, total score; GAD: Generalized Anxiety Disorder Scale, total score; PHQ-9: Patient Health Questionnaire; PSQ: Perceived Stress Questionnaire, total score; TFEQ: Three-Factor-Eating-Questionnaire.

Table S3. Mediation model (regression with EDE-Q, direct, and indirect paths) for patients with obesity and without regular binge eating.

|                          | Regressions with EDE-Q (a) |                          | Indirect path (ab) |                          | Direct path (c') |                          |
|--------------------------|----------------------------|--------------------------|--------------------|--------------------------|------------------|--------------------------|
|                          | p-value                    | Standardized coefficient | p-value            | Standardized coefficient | p-value          | Standardized coefficient |
| TFEQ cognitive restraint | <b>&lt;0.001</b>           | <b>0.190</b>             | 0.071              | -0.014                   | 0.143            | 0.057                    |
| TFEQ disinhibition       | 0.590                      | 0.023                    | 0.631              | -0.002                   | <b>0.040</b>     | <b>0.105</b>             |
| TFEQ hunger              | <b>&lt;0.001</b>           | <b>0.147</b>             | 0.097              | -0.011                   | 0.786            | -0.013                   |
| BIS                      | <b>&lt;0.001</b>           | <b>0.147</b>             | 0.100              | -0.011                   | <b>0.005</b>     | <b>-0.107</b>            |
| PHQ-9                    | <b>&lt;0.001</b>           | <b>0.328</b>             | 0.081              | -0.025                   | 0.115            | -0.103                   |
| PSQ                      | <b>&lt;0.001</b>           | <b>0.261</b>             | 0.132              | -0.019                   | 0.089            | -0.098                   |
| GAD                      | 0.066                      | -0.110                   | 0.241              | 0.008                    | <b>0.002</b>     | <b>0.245</b>             |

(a) Standardized coefficients for regressions between psychopathology/eating behavior variables and EDE-Q; (ab): standardized coefficients for the indirect path between psychopathology/eating behavior variables and admission-discharge BMI difference via EDE-Q, (c'): Standardized coefficients for the direct path between psychopathology/eating behavior variables and admission-discharge BMI difference, controlling for the mediating variable (EDE-Q).

**Notes:** Variables involved in the final mediation model are reported in bold and underlined. Statistically significant correlations and mediation paths are reported in bold.

Abbreviations: BIS: Barratt Impulsiveness Scale, total score; EDE-Q: Eating Disorder Examination Questionnaire, total score; GAD: Generalized Anxiety Disorder Scale, total score; PHQ-9: Patient Health Questionnaire; PSQ: Perceived Stress Questionnaire, total score; TFEQ: Three-Factor-Eating-Questionnaire.
